# Supplementary material for: F18:A-:B1 Plasmids Carrying blaCTX-M-55 Are Prevalent among Escherichia coli Isolated from Duck–Fish Polyculture Farms
Source: MDPI journal article supplement (doi:10.3390/antibiotics12060961), 2023-05-25
Supplement: s1 [file s1]

## Supplementary materials

Table S1: Sample and isolate information from different sources

| Sample Source                            | Farm A |      |         |            | Farm B |      |         |            | Farm C |      |         |            | Farm D |      |         |            |
|------------------------------------------|--------|------|---------|------------|--------|------|---------|------------|--------|------|---------|------------|--------|------|---------|------------|
|                                          | Water  | Soil | Foliage | Duck fecal | Water  | Soil | Foliage | Duck fecal | Water  | Soil | Foliage | Duck fecal | Water  | Soil | Foliage | Duck fecal |
| Sample Number (n)                        | 102    | 81   | 59      | 199        | 106    | 129  | 0       | 158        | 138    | 152  | 20      | 300        | 150    | 114  | 0       | 300        |
| CTX-M-1G-positive Strains (n)            | 2      | 2    | 1       | 19         | 7      | 1    | 0       | 21         | 7      | 0    | 0       | 54         | 18     | 4    | 0       | 60         |
| <i>bla</i> CTX-M-55 Positive Strains (n) | 2      | 2    | 1       | 17         | 7      | 1    | 0       | 14         | 7      | 0    | 0       | 51         | 15     | 4    | 0       | 56         |
| <i>bla</i> CTX-M-55 Positive Rate (%)    | 4.25   | 8.0  | 25.0    | 13.0       | 13.2   | 4.0  | 0       | 15.4       | 10.1   | 0    | 0       | 28.8       | 21.1   | 16.7 | 0       | 38.4       |

Table S2: The MIC results of 177 *bla*<sub>CTX-M-55</sub>-positive *E. coli* strains

| Antibiotics   | Resistance<br>breakpoint | MIC <sub>50</sub><br>( $\mu\text{g/mL}$ ) | MIC <sub>90</sub><br>( $\mu\text{g/mL}$ ) | MIC range<br>( $\mu\text{g/mL}$ ) | Resistance rate<br>(%) |
|---------------|--------------------------|-------------------------------------------|-------------------------------------------|-----------------------------------|------------------------|
| Cefotaxime    | $\geq 4$                 | 128                                       | 256                                       | 4- > 512                          | 100                    |
| Ceftiofur     | $\geq 8$                 | 128                                       | 512                                       | 0.25- > 512                       | 98.3                   |
| Meropenem     | $\geq 4$                 | 0.015                                     | 0.03                                      | 0.015-8                           | 3.38                   |
| Ceftazidime   | $\geq 16$                | 8                                         | 32                                        | 0.125- > 512                      | 31.07                  |
| Amikacin      | $\geq 64$                | 2                                         | 4                                         | < 0.5- > 512                      | 5.64                   |
| Ciprofloxacin | $\geq 1$                 | 16                                        | 128                                       | 0.25- > 512                       | 96.04                  |
| Tigecycline   | $\geq 2$                 | 0.5                                       | 1                                         | 0.06-8                            | 5.64                   |
| Florfenicol   | $\geq 16$                | 256                                       | 512                                       | 4- > 512                          | 95.4                   |
| Colistin      | $\geq 4$                 | 0.5                                       | 8                                         | 0.25-16                           | 35.0                   |
| Fosfomycin    | $\geq 256$               | 2                                         | 512                                       | 1-1024                            | 29.9                   |

Table S3: Bacterial information and antimicrobial resistance profiles

| Strain name | Sources    | IncF plasmid type | Transfer frequency    | <i>bla</i> <sub>CTX-M-55</sub> location | <i>bla</i> <sub>CTX-M-55</sub> genetic environment | Resistance phenotype    |
|-------------|------------|-------------------|-----------------------|-----------------------------------------|----------------------------------------------------|-------------------------|
| ND104       | Fecal swab | F33:A-:B-         | -                     | Plasmid                                 | Type III                                           | CTX/CTF/CIP/FLF/CL/FOS  |
| RC2         | Water      | F33:A-:B-         | -                     | Plasmid                                 | Type III                                           | CTX/CTF/CIP/FLF/CL/FOS  |
| DT6         | Soil       | F33:A-:B-         | $2.41 \times 10^{-4}$ | Plasmid                                 | Type II                                            | CTX/CTF/CIP/FLF/FOS     |
| KS25        | Fecal swab | F33:A-:B-         | $1.67 \times 10^{-4}$ | Plasmid                                 | Type III                                           | CTX/CTF/CIP/FLF/CL      |
| RDW3        | Water      | F33:A-:B-         | $1.18 \times 10^{-1}$ | Plasmid                                 | Type III                                           | CTX/CTF/CIP/FLF/FOS     |
| DW6         | Water      | F33:A-:B-         | $2.6 \times 10^{-5}$  | Plasmid                                 | Type II                                            | CTX/CTF/CTZ/CIP/FLF/CL  |
| JDS19       | Fecal swab | F33:A-:B-         | $1.12 \times 10^{-2}$ | Plasmid                                 | Type II                                            | CTX/CTF/CIP/            |
| RDW5        | Water      | F33:A-:B-         | $5.94 \times 10^{-2}$ | Plasmid                                 | Type III                                           | CTX/CTF/CIP/FLF/FOS     |
| B1S17       | Water      | F33:A-:B-         | $1.63 \times 10^{-1}$ | Plasmid                                 | Type III                                           | CTX/CTF/CIP/FLF/FOS     |
| UC8         | Fecal swab | F33:A-:B-         | $3.48 \times 10^{-2}$ | Plasmid                                 | Type II                                            | CTX/CTF/CTZ/CIP/FLF/FOS |
| JDS24       | Fecal swab | F18:A-:B1         | $6.39 \times 10^{-2}$ | Plasmid                                 | Type II                                            | CTX/CTF/CIP             |
| B1S11       | Water      | F18:A-:B1         | -                     | Plasmid                                 | Type IV                                            | CTX/CTF/CIP/FLF/FOS     |
| TC5         | Fecal swab | F18:A-:B1         | -                     | Plasmid                                 | Type I                                             | CTX/CTF/FLF/CL          |
| UD5         | Fecal swab | F18:A-:B1         | -                     | Plasmid                                 | Type I                                             | CTX/CTF/CIP/FLF/CL      |
| RD1         | Fecal swab | F18:A-:B1         | -                     | Plasmid                                 | Type I                                             | CTX/CTF/CIP/FLF/CL      |
| B1W1        | Water      | F18:A-:B1         | -                     | Plasmid                                 | Type I                                             | CTX/CTF/CIP/FLF/CL      |
| UD9         | Fecal swab | F18:A-:B1         | -                     | Plasmid                                 | Type I                                             | CTX/CTF/CIP/FLF/CL      |
| D7          | Fecal swab | F18:A-:B1         | -                     | Plasmid                                 | Type I                                             | CTX/CTF/CIP/FLF/CL      |
| PBS4        | Fecal swab | F18:A-:B1         | $1.54 \times 10^{-2}$ | Plasmid                                 | Type II                                            | CTX/CTF/CIP/FLF         |
| PBS5        | Fecal swab | F18:A-:B1         | $1.91 \times 10^{-2}$ | Plasmid                                 | Type II                                            | CTX/CTF/CIP/FLF         |
| PBS10       | Fecal swab | F18:A-:B1         | $4.06 \times 10^{-2}$ | Plasmid                                 | Type II                                            | CTX/CTF/CIP/FLF         |
| PBS13       | Fecal swab | F18:A-:B1         | $1.99 \times 10^{-2}$ | Plasmid                                 | Type II                                            | CTX/CTF/CIP/FLF         |
| C6          | Fecal swab | F18:A-:B1         | -                     | Plasmid                                 | Type II                                            | CTX/CTF/CIP/FLF         |
| PBS21       | Fecal swab | F18:A-:B1         | $1.53 \times 10^{-2}$ | Plasmid                                 | Type II                                            | CTX/CTF/CIP/FLF         |

|       |            |           |                       |            |          |                                    |
|-------|------------|-----------|-----------------------|------------|----------|------------------------------------|
| D52   | Fecal swab | F18:A-:B1 | -                     | Chromosome | Type I   | CTX/CTF/CIP/FLF                    |
| C28   | Fecal swab | F18:A-:B1 | -                     | Plasmid    | Type I   | CTX/CTF/CTZ/CIP/FLF/CL/FOS         |
| MA121 | Fecal swab | F18:A-:B1 | $2.47 \times 10^{-2}$ | Plasmid    | Type III | CTX/CTF/CIP/FLF                    |
| D50   | Fecal swab | F18:A-:B1 | -                     | Chromosome | Type I   | CTX/CTF/CTZ/CIP/FLF                |
| NDT16 | Soil       | F18:A-:B1 | -                     | Chromosome | Type I   | CTX/CTF/CIP/FLF                    |
| D51   | Fecal swab | F18:A-:B1 | -                     | Chromosome | Type I   | CTX/CTF/CIP/FLF                    |
| D38   | Fecal swab | F18:A-:B1 | -                     | Chromosome | Type I   | CTX/CTF/CIP/FLF                    |
| D49   | Fecal swab | F18:A-:B1 | -                     | Chromosome | Type I   | CTX/CTF/CIP/FLF                    |
| D33   | Fecal swab | F18:A-:B1 | -                     | Chromosome | Type I   | CTX/CTF/CIP/FLF                    |
| KS22  | Fecal swab | F18:A-:B1 | $2.47 \times 10^{-2}$ | Plasmid    | Type II  | CTX/CTF/CIP/FLF/CL/FOS             |
| KW21  | Water      | F18:A-:B1 | $8.60 \times 10^{-3}$ | Plasmid    | Type III | CTX/CTF/CIP/FLF/CL/FOS             |
| D2    | Fecal swab | F18:A-:B1 | -                     | Chromosome | Type I   | CTX/CTF/CIP/FLF/CL                 |
| UD1   | Fecal swab | F18:A-:B1 | $8.35 \times 10^{-5}$ | Plasmid    | Type III | CTX/CTF/CIP/FLF                    |
| C44   | Fecal swab | F18:A-:B1 | -                     | Chromosome | Type I   | CTX/CTF/MRO/CTZ/AMI/CIP/FLF/CL/FOS |
| C48   | Fecal swab | F18:A-:B1 | -                     | Chromosome | Type I   | CTX/CTF/CTZ/CIP/FLF/FOS            |
| MD91  | Fecal swab | F18:A-:B1 | -                     | Plasmid    | Type I   | CTX/CTF/CIP/FLF/CL                 |
| A44   | Fecal swab | F18:A-:B1 | $2.6 \times 10^{-5}$  | Plasmid    | Type I   | CTX/CTF/CTZ/FLF                    |
| PBS14 | Fecal swab | F18:A-:B1 | -                     | Plasmid    | Type III | CTX/CTF/CIP/FLF                    |
| C42   | Fecal swab | F18:A-:B1 | -                     | Plasmid    | Type IV  | CTX/CTF/CTZ/CIP/FLF                |
| D5    | Fecal swab | F18:A-:B1 | $4.65 \times 10^{-1}$ | Plasmid    | Type II  | CTX/CTF/CIP/FLF/CL/FOS             |
| D25   | Fecal swab | F18:A-:B1 | -                     | Chromosome | Type I   | CTX/CTZ/CIP/FLF/CL/FOS             |
| RDW9  | Water      | F18:A-:B1 | -                     | Plasmid    | Type I   | CTX/CTF/CIP/FLF                    |
| BT2   | Soil       | F18:A-:B1 | $4.56 \times 10^{-6}$ | Plasmid    | Type IV  | CTX/CTF/CIP/FLF                    |

CTX, cefotaxime; CTF, ceftiofur; CTZ, ceftazidime; MEM, meropenem; FLF, florfenicol; CIP, ciprofloxacin; FOS, fosfomycin; CL, colistin; AMK, amikacin; TIG, tigecycline.

Table S4: Characteristics of sequenced strains and obtained F18:A-:B1 plasmids

| Strain name | Source | Collection year | <i>bla</i> <sub>CTX-M-55</sub> transferability | Plasmid name | Plasmid Size | GC Content |
|-------------|--------|-----------------|------------------------------------------------|--------------|--------------|------------|
| KW21        | Water  | 2018            | Yes                                            | pKW21        | 179,817 bp   | 52%        |
| B1W1        | Water  | 2019            | No                                             | pB1W1        | 108,673 bp   | 50%        |
| B1S11       | Fecal  | 2019            | No                                             | pB1S11       | 151,146 bp   | 50%        |
| PBS4        | Fecal  | 2019            | Yes                                            | pPBS4        | 137,545 bp   | 51%        |

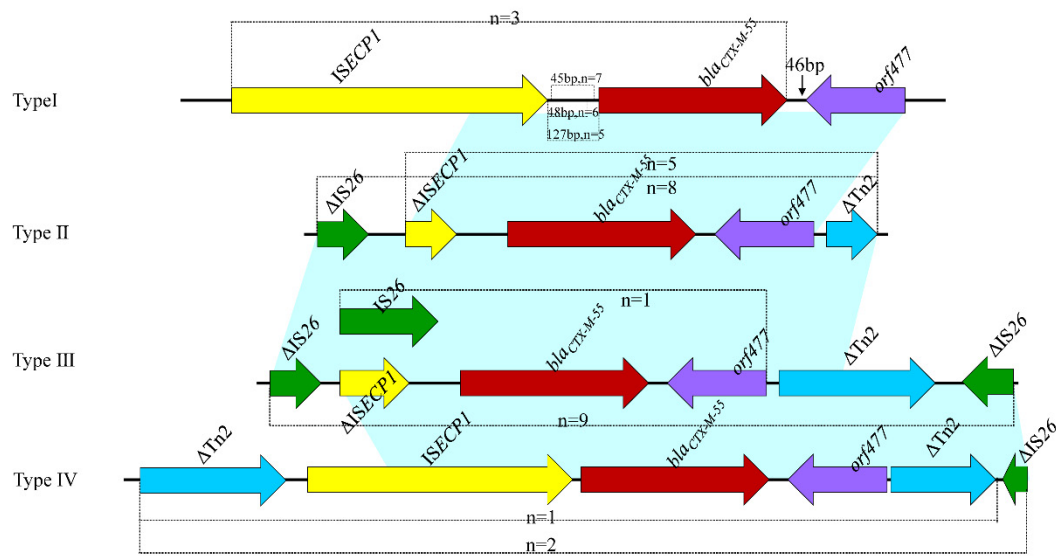

Figure S1: Comparison of four types of *bla*<sub>CTX-M-55</sub> genomic contexts in 47 strains

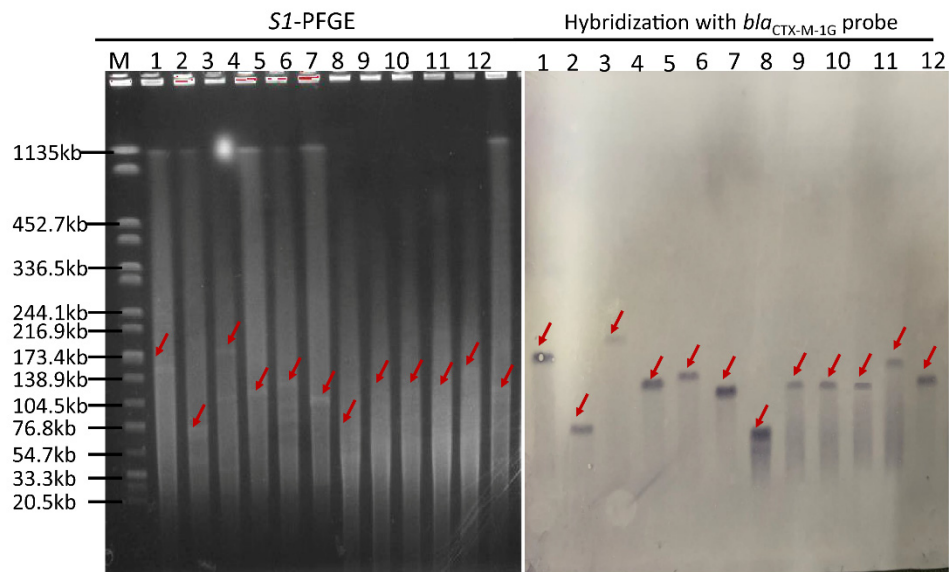

Figure S2 Pulsed field gels of S1 digested genomic DNA and Southern blot in-gel hybridization with *bla*<sub>CTX-M-55</sub> probe. M: H9812, 1-12: *bla*<sub>CTX-M-55</sub>-positive transconjugants MA121, D5, KW21, PBS4, KS22, PBS10, BT2, PBS5, PBS13, PBS21, UD1 and A44.
